# Supplementary material for: Indirect Estimation of the Comparative Treatment Effect in Pharmacogenomic Subgroups
Source: PLoS One. 2013 Aug 27;8(8):e72256. doi: 10.1371/journal.pone.0072256 (PMC3754999; doi:10.1371/journal.pone.0072256)
Supplement: File S1 — Ms Excel spreadsheet with example calculations based on the clopidogrel pharmacogenetics case study. (XLSX) [file pone.0072256.s001.xlsx]

## Sheet: ticagrelor
PLATO - ticagrelor vs clopidogrel
			Input
RR Inputs	Point Estimate		Derived
RRm[e|ticagrelor]	1
RRt[e]	0.84
RRm[e|clopidogrel]	[see below - a range of values are used]
Probability Inputs	Point Estimate
p[A]	0.28
p[e|clopidogrel]	0.117
p[e|ticagrelor]	0.09828
	Subgroup risks				Subgroup treatment effect
RRm[e|clopidogrel]	P[e|clopidogrel, LoF']	P[e|clopidogrel, LoF]	P[e|ticagrelor, LoF']	P[e|ticagrelor, LoF]	RRt[e|LoF]	RRt[e|LoF']	RRt[e|LoF]	RRt[e|LoF']
1	0.117	0.117	0.09828	0.09828	0.84	0.84	0.84	0.84
1.1	0.113813	0.125195	0.09828	0.09828	0.785018	0.86352	0.785018	0.86352
1.2	0.110795	0.132955	0.09828	0.09828	0.7392	0.88704	0.7392	0.88704
1.3	0.107934	0.140314	0.09828	0.09828	0.700431	0.91056	0.700431	0.91056
1.4	0.105216	0.147302	0.09828	0.09828	0.6672	0.93408	0.6672	0.93408
1.5	0.102632	0.153947	0.09828	0.09828	0.6384	0.9576	0.6384	0.9576
1.6	0.100171	0.160274	0.09828	0.09828	0.6132	0.98112	0.6132	0.98112
